# Supplementary material
Source: PubMed Central journal article supplement (PMC4031297)
Supplement: NIHMS577021-supplement-supplement_1.pdf [file NIHMS577021-supplement-supplement_1.pdf]

**Supplementary Table 1.** Distribution of serum PCDD, PCDF, and PCB concentrations and 1998 and 2005 WHO TEQs in pooled serum collected in 1976 from female residents of Zone non-ABR (n=9 pools; females, 0 to 40 years of age), Seveso, Italy.

| Analyte                            | Average<br>Detection<br>Limit | %<br>Detected | Concentration <sup>a</sup><br>(lipid-adj.)<br>Median (range) | WHO<br>1998<br>TEF | 1998 TEQ<br>(pg/g lipid)<br>Mean (range) | WHO<br>2005<br>TEF | 2005 TEQ<br>(pg/g lipid)<br>Mean (range) |
|------------------------------------|-------------------------------|---------------|--------------------------------------------------------------|--------------------|------------------------------------------|--------------------|------------------------------------------|
| <i>PCDDs (pg/g lipid)</i>          |                               |               |                                                              |                    |                                          |                    |                                          |
| 2378-TCDD                          | 1.4                           | 100.0         | 17.1 (8.7-47.6)                                              | 1                  | 20.2 (8.7-47.6)                          | 1                  | 20.2 (8.7-47.6)                          |
| 12378-PeCDD                        | 1.6                           | 88.9          | 6.7 (1.4-9.6)                                                | 1                  | 6.7 (1.4-9.6)                            | 1                  | 6.7 (1.4-9.6)                            |
| 123478-HxCDD                       | 3.2                           | 22.2          | 1.9 (1.2-6.6)                                                | 0.1                | --- (---)                                | 0.1                | --- (---)                                |
| 123678-HxCDD                       | 1.8                           | 100.0         | 25.7 (17.6-34.7)                                             | 0.1                | 2.7 (1.8-3.5)                            | 0.1                | 2.7 (1.8-3.5)                            |
| 123789-HxCDD                       | 2.1                           | 100.0         | 9.8 (8.1-12.6)                                               | 0.1                | 1.0 (0.8-1.3)                            | 0.1                | 1.0 (0.8-1.3)                            |
| 1234678-HpCDD                      | 2.5                           | 100.0         | 169.0 (91.0-271.0)                                           | 0.01               | 1.8 (0.9-2.7)                            | 0.01               | 1.8 (0.9-2.7)                            |
| OCDD                               | 31.6                          | 100.0         | 1400.0 (808.0-2170)                                          | 0.0001             | 0.2 (0.1-0.2)                            | 0.0003             | 0.4 (0.2-0.7)                            |
| <i>PCDFs (pg/g lipid)</i>          |                               |               |                                                              |                    |                                          |                    |                                          |
| 2378-TCDF                          | 1.4                           | 33.3          | 1.1 (0.4-1.8)                                                | 0.1                | --- (---)                                | 0.1                | --- (---)                                |
| 12378-PeCDF                        | 1.5                           | 0.0           | 0.6 (0.4-1.5)                                                | 0.05               | --- (---)                                | 0.03               | --- (---)                                |
| 23478-PeCDF                        | 1.5                           | 100.0         | 27.0 (20.2-32.5)                                             | 0.5                | 13.3 (10.1-16.3)                         | 0.3                | 8.0 (6.1-9.8)                            |
| 123478-HxCDF                       | 1.5                           | 100.0         | 14.2 (9.8-18.0)                                              | 0.1                | 1.4 (1.0-1.8)                            | 0.1                | 1.4 (1.0-1.8)                            |
| 123678-HxCDF                       | 1.3                           | 88.9          | 12.1 (1.3-16.5)                                              | 0.1                | 1.1 (0.1-1.7)                            | 0.1                | 1.1 (0.1-1.7)                            |
| 123789-HxCDF                       | 1.4                           | 0.0           | 0.7 (0.5-1.3)                                                | 0.1                | --- (---)                                | 0.1                | --- (---)                                |
| 234678-HxCDF                       | 1.4                           | 66.7          | 4.1 (0.8-6.4)                                                | 0.1                | 0.3 (0.1-0.6)                            | 0.1                | 0.3 (0.1-0.6)                            |
| 1234678-HpCDF                      | 2.8                           | 66.7          | 25.8 (1.3-35.2)                                              | 0.01               | 0.2 (0.0-0.4)                            | 0.01               | 0.2 (0.0-0.4)                            |
| 1234789-HpCDF                      | 2.8                           | 0.0           | 1.3 (0.8-1.8)                                                | 0.01               | --- (---)                                | 0.01               | --- (---)                                |
| OCDF                               | 1.1                           | 66.7          | 11.3 (8.3-13.9)                                              | 0.0001             | 0.0 (0.0-0.0)                            | 0.0003             | 0.0 (0.0-0.0)                            |
| <i>Co-planar PCBs (pg/g lipid)</i> |                               |               |                                                              |                    |                                          |                    |                                          |
| PCB 77                             | --                            | --            | --                                                           | 0.0001             | --                                       | 0.0001             | --                                       |
| PCB 81                             | 3.5                           | 100.0         | 35.1 (23.3-69.6)                                             | 0.0001             | 0.0 (0.0-0.0)                            | 0.0003             | 0.0 (0.0-0.0)                            |
| PCB 126                            | 2.8                           | 100.0         | 253.0 (208.0-373.0)                                          | 0.1                | 26.9 (20.8-37.3)                         | 0.1                | 26.9 (20.8-37.3)                         |

**Supplementary Table 1 (continued).**

| Analyte                             | Average<br>Detection<br>Limit | %<br>Detected | Concentration <sup>a</sup><br>(lipid-adj.)<br>Median (range) | WHO<br>1998<br>TEF | 1998 TEQ<br>(pg/g lipid)<br>Mean (range) | WHO<br>2005<br>TEF | 2005 TEQ<br>(pg/g lipid)<br>Mean (range) |
|-------------------------------------|-------------------------------|---------------|--------------------------------------------------------------|--------------------|------------------------------------------|--------------------|------------------------------------------|
| PCB 169                             | 2.9                           | 100.0         | 85.9 (53.5-101.0)                                            | 0.01               | 0.8 (0.5-1.0)                            | 0.03               | 2.5 (1.6-3.0)                            |
| <i>Mono-ortho PCBs (ng/g lipid)</i> |                               |               |                                                              |                    |                                          |                    |                                          |
| PCB 105                             | 9.7                           | 77.8          | 19.9 (16.3-46.4)                                             | 0.0001             | 2.3 (1.6-4.6)                            | 0.00003            | 0.7 (0.5-1.4)                            |
| PCB 118                             | 17.1                          | 100.0         | 97.9 (84.0-173.0)                                            | 0.0001             | 11.3 (8.4-17.3)                          | 0.00003            | 3.4 (2.5-5.2)                            |
| PCB 156                             | 11.1                          | 77.8          | 22.9 (16.5-31.5)                                             | 0.0005             | 11.4 (8.3-15.8)                          | 0.00003            | 0.7 (0.5-0.9)                            |
| PCB 157                             | 12.0                          | 33.3          | 6.1 (3.8-8.0)                                                | 0.0005             | --- ( -- )                               | 0.00003            | --- ( -- )                               |
| PCB 167                             | 8.8                           | 55.6          | 12.9 (9.6-16.3)                                              | 0.00001            | 0.1 (0.1-0.2)                            | 0.00003            | 0.4 (0.3-0.5)                            |
| PCB 189                             | 10.3                          | 22.2          | 2.7 (1.8-3.1)                                                | 0.0001             | --- ( -- )                               | 0.00003            | --- ( -- )                               |
| PCDD TEQ                            |                               |               |                                                              |                    | 32.5 (18.3-60.7)                         |                    | 32.8 (18.5-61.1)                         |
| PCDF TEQ                            |                               |               |                                                              |                    | 16.4 (12.7-20.5)                         |                    | 11.1 (8.5-14.0)                          |
| Co-planar PCB TEQ                   |                               |               |                                                              |                    | 27.8 (21.5-38.3)                         |                    | 29.5 (23.0-40.3)                         |
| Mono-ortho PCB TEQ                  |                               |               |                                                              |                    | 25.0 (19.0-37.9)                         |                    | 5.1 (3.8-8.0)                            |
| Total TEQ                           |                               |               |                                                              |                    | 101.6 (85.7-121.6)                       |                    | 78.4 (65.9-100.9)                        |

<sup>a</sup> Pools below LOD were assigned a value of ½ LOD.
